# Supplementary material for: Efficiency of DNA Isolation Methods Based on Silica Columns and Magnetic Separation Tested for the Detection of Mycobacterium avium Subsp. Paratuberculosis in Milk and Faeces
Source: PubMed Central journal article supplement (PMC7697941; doi:10.3390/ma13225112), 2020-11-12
Supplement: materials-13-05112-s001.pdf [file materials-13-05112-s001.pdf]

## Supplementary Materials

# Efficiency of DNA Isolation Methods Based on Silica Columns and Magnetic Separation Tested for the Detection of *Mycobacterium Avium* Subsp. *Paratuberculosis* in Milk and Faeces

Marketa Husakova <sup>1,2</sup>, Petr Kralik <sup>1,3</sup> Vladimir Babak <sup>1</sup>, and Iva Slana <sup>1,\*</sup>

<sup>1</sup> Veterinary Research Institute, Hudcova 70, 621 00 Brno, Czech Republic; marketahusakova12@centrum.cz (M.H.); kralikp@vfu.cz (P.K.); babak@vri.cz (V.B.)

<sup>2</sup> Department of Experimental Biology, Faculty of Science, Masaryk University, Kamenice 5, 625 00 Brno, Czech Republic

<sup>3</sup> Department of Hygiene and Technology of Food of Animal Origin and of Gastronomy, Faculty of Veterinary Hygiene and Ecology, University of Veterinary and Pharmaceutical Sciences, 612 42 Brno, Czech Republic

\* Correspondence: slana@vri.cz; Tel.: +420777786711

**Table S1.** List of isolation kits used for isolation of MAP DNA from milk.

| Kit Number | Name of the Kit (company)                                                                                     | Isolation Method    |
|------------|---------------------------------------------------------------------------------------------------------------|---------------------|
| 1          | DNeasy® Blood and tissue kit (QIAGEN, Hilden, Germany)                                                        | silica columns      |
| 2          | ZR Quick-DNA Fecal Soil Microbe Microprep Kit (Zymo Research, Tustin, CA, USA)                                | silica columns      |
| 3          | MagVet <i>Mycobacterium paratuberculosis</i> Isolation Kit (LSI, Lissieu, France)                             | magnetic separation |
| 4          | MagMAX™ Total Nucleic Acid Isolation Kit (Applied Biosystems by Thermo Fisher Scientific, Vilnius, Lithuania) | magnetic separation |
| 5          | Nuclisens Magnetic Extraction Reagents (Biomérieux, Marcy-l'Étoile, France)                                   | magnetic separation |
| 6          | BioSprint 96 One-For-All-Vet (QIAGEN, Hilden, Germany)                                                        | magnetic separation |
| 7          | EZ1 DNA Tissue Kit (QIAGEN, Hilden, Germany)                                                                  | magnetic separation |

**Table S2.** List of isolation kits used for isolation of MAP DNA from faeces.

| Kit Number | Name of the Kit (company)                                                      | Isolation Method |
|------------|--------------------------------------------------------------------------------|------------------|
| 1          | ZR Quick-DNA Fecal Soil Microbe Microprep Kit (Zymo Research, Tustin, CA, USA) | silica columns   |
| 2          | QIAamp DNA Stool Mini Kit (QIAGEN, Hilden, Germany)                            | silica columns   |
| 3          | QIAamp Fast DNA Stool Mini Kit (QIAGEN, Hilden, Germany)                       | silica columns   |
| 4          | Power Fecal DNA Kit (QIAGEN, Hilden, Germany)                                  | silica columns   |
| 5          | DNeasy Power Soil Kit (QIAGEN, Hilden, Germany)                                | silica columns   |
| 6          | NucleoSpin DNA Stool (Macherey-Nagel, Düren, Germany)                          | silica columns   |

|    |                                                                                                              |                     |
|----|--------------------------------------------------------------------------------------------------------------|---------------------|
| 7  | Gen Elute Stool DNA Isolation Kit (Sigma-Aldrich, St. Louis, MO, USA)                                        | silica columns      |
| 8  | Innu PREP Stool DNA kit (Analytik Jena, Berlin, Germany)                                                     | silica columns      |
| 9  | MagMAX Total Nucleic Acid Isolation Kit (Applied Biosystems by Thermo Fisher Scientific, Vilnius, Lithuania) | magnetic separation |
| 10 | Nuclisens Magnetic Extraction Reagents (Biomérieux, Marcy-l'Étoile, France)                                  | magnetic separation |
| 11 | MagVet Mycobacterium paratuberculosis Isolation Kit (LSI, Lissieu, France)                                   | magnetic separation |
| 12 | ID Gene Mag Paratuberculosis Extraction Kit (ID vet Genetics, Grabels, France)                               | magnetic separation |

**Table S3.** List of isolation kits used for automatic magnetic separation of MAP DNA from milk and faeces.

| <b>Kit Number</b> | <b>Name of the Kit (company)</b>                                                                               |
|-------------------|----------------------------------------------------------------------------------------------------------------|
| 1                 | ID Gene™ Mag Universal Extraction Kit (ID vet Genetics, Grabels, France)                                       |
| 2                 | ID Gene™ Mag Fast Extraction Kit (ID vet Genetics, Grabels, France)                                            |
| 3                 | MagVet <i>Mycobacterium paratuberculosis</i> Isolation Kit (LSI, Lissieu, France).                             |
| 4                 | MagMAX™ Total Nucleic Acid Isolation Kit (Applied Biosystems by Thermo Fisher Scientific, Vilnius, Lithuania). |
| 5                 | BioSprint 96 One-For-All-Vet (QIAGEN, Hilden, Germany).                                                        |

**Table S4.** Data derived from isolation efficiency of MAP DNA from milk, unit:percentage [%].

| Kit                           | Isolation Efficiency | Median | Mean  | Upper Quartile | Lower Quartile | Standard Deviation |
|-------------------------------|----------------------|--------|-------|----------------|----------------|--------------------|
| Blood and Tissue <sup>a</sup> | 29.7                 |        |       |                |                |                    |
|                               | 10.4                 | 10.4   | 15.60 | 20.05          | 8.55           | 10.08              |
|                               | 6.7                  |        |       |                |                |                    |
| MagVet <sup>b</sup>           | 0.8                  |        |       |                |                |                    |
|                               | 0.6                  | 0.6    | 0.63  | 0.7            | 0.55           | 0.12               |
|                               | 0.5                  |        |       |                |                |                    |
| MagMAX <sup>c</sup>           | 3.2                  |        |       |                |                |                    |
|                               | 2.3                  | 2.3    | 2.20  | 2.75           | 1.7            | 0.86               |
|                               | 1.1                  |        |       |                |                |                    |
| Nuclisens <sup>d</sup>        | 0.1                  |        |       |                |                |                    |
|                               | 0                    | 0      | 0.03  | 0.05           | 0              | 0.05               |
|                               | 0                    |        |       |                |                |                    |
| BioSprint <sup>e</sup>        | 1.1                  |        |       |                |                |                    |
|                               | 0.8                  | 0.8    | 0.83  | 0.95           | 0.7            | 0.21               |
|                               | 0.6                  |        |       |                |                |                    |
| EZ1 <sup>f</sup>              | 0.1                  |        |       |                |                |                    |
|                               | 0.1                  | 0.1    | 0.10  | 0.1            | 0.1            | 0.00               |
|                               | 0.1                  |        |       |                |                |                    |
| ZymoResearch <sup>g</sup>     | 19.7                 |        |       |                |                |                    |
|                               | 9.7                  | 10.8   | 13.40 | 15.25          | 10.25          | 4.48               |
|                               | 10.8                 |        |       |                |                |                    |

<sup>a</sup>DNeasy® Blood and tissue kit (QIAGEN, Hilden, Germany); <sup>b</sup>MagVet *Mycobacterium paratuberculosis* Isolation Kit (LSI, Lissieu, France); <sup>c</sup>MagMAX™ Total Nucleic Acid Isolation Kit (Applied Biosystems by Thermo Fisher Scientific, Vilnius, Lithuania); <sup>d</sup>Nuclisens Magnetic Extraction Reagents (Biomérieux, Marcy-l'Étoile, France); <sup>e</sup>BioSprint 96 One-For-All-Vet (QIAGEN, Hilden, Germany); <sup>f</sup>EZ1 DNA Tissue Kit (QIAGEN, Hilden, Germany); <sup>g</sup>ZR Quick-DNA Fecal Soil Microbe Microprep Kit (Zymo Research, Tustin, CA, USA).

**Table S5.** Data derived from isolation efficiency of MAP DNA from faecal pellets, unit:percentage [%].

| Kit                                | Isolation Efficiency | Median | Mean  | Upper Quartile | Lower Quartile | Standard Deviation |
|------------------------------------|----------------------|--------|-------|----------------|----------------|--------------------|
| ZymoResearch <sup>a</sup>          | 64.8                 | 53.7   | 57.07 | 59.25          | 53.2           | 5.48               |
|                                    | 52.7                 |        |       |                |                |                    |
|                                    | 53.7                 |        |       |                |                |                    |
| QIAamp DNA Stool <sup>b</sup>      | 26.4                 | 17.8   | 18.50 | 22.1           | 14.55          | 6.18               |
|                                    | 11.3                 |        |       |                |                |                    |
|                                    | 17.8                 |        |       |                |                |                    |
| QIAamp Fast DNA Stool <sup>c</sup> | 20.1                 | 5.3    | 9.53  | 12.7           | 4.25           | 7.52               |
|                                    | 3.2                  |        |       |                |                |                    |
|                                    | 5.3                  |        |       |                |                |                    |
| Power Fecal <sup>d</sup>           | 48.5                 | 22.6   | 29.93 | 35.55          | 20.65          | 13.22              |
|                                    | 22.6                 |        |       |                |                |                    |
|                                    | 18.7                 |        |       |                |                |                    |
| Power Soil <sup>e</sup>            | 42.4                 | 23     | 28.53 | 32.7           | 21.6           | 9.87               |
|                                    | 23                   |        |       |                |                |                    |
|                                    | 20.2                 |        |       |                |                |                    |
| NucleoSpin <sup>f</sup>            | 43.5                 | 30.8   | 33.13 | 37.15          | 27.95          | 7.69               |
|                                    | 30.8                 |        |       |                |                |                    |
|                                    | 25.1                 |        |       |                |                |                    |
| GeneElute <sup>g</sup>             | 23.7                 | 3.7    | 9.87  | 13.7           | 2.95           | 9.80               |
|                                    | 3.7                  |        |       |                |                |                    |
|                                    | 2.2                  |        |       |                |                |                    |
| innuPREP <sup>h</sup>              | 0                    | 0.1    | 0.07  | 0.1            | 0.05           | 0.05               |
|                                    | 0.1                  |        |       |                |                |                    |
|                                    | 0.1                  |        |       |                |                |                    |
| MagMAX <sup>i</sup>                | 19                   | 15.1   | 15.50 | 17.05          | 13.75          | 2.71               |
|                                    | 12.4                 |        |       |                |                |                    |
|                                    | 15.1                 |        |       |                |                |                    |
| Nuclisens <sup>j</sup>             | 2                    | 0.7    | 1.13  | 1.35           | 0.7            | 0.61               |
|                                    | 0.7                  |        |       |                |                |                    |
|                                    | 0.7                  |        |       |                |                |                    |
| MagVet <sup>k</sup>                | 3.1                  | 2.4    | 2.23  | 2.75           | 1.8            | 0.78               |
|                                    | 1.2                  |        |       |                |                |                    |
|                                    | 2.4                  |        |       |                |                |                    |
| ID Gene <sup>l</sup>               | 4                    | 1.8    | 2.30  | 2.9            | 1.45           | 1.24               |
|                                    | 1.8                  |        |       |                |                |                    |
|                                    | 1.1                  |        |       |                |                |                    |

<sup>a</sup>ZR Quick-DNA Fecal Soil Microbe Microprep Kit (Zymo Research, Tustin, CA, USA); <sup>b</sup>QIAamp DNA Stool Mini Kit (QIAGEN, Hilden, Germany); <sup>c</sup>QIAamp Fast DNA Stool Mini Kit (QIAGEN, Hilden, Germany); <sup>d</sup>Power Fecal DNA Kit (QIAGEN, Hilden, Germany); <sup>e</sup>DNeasy Power Soil Kit (QIAGEN, Hilden, Germany); <sup>f</sup>NucleoSpin DNA Stool (Macherey-Nagel, Düren, Germany); <sup>g</sup>Gen Elute Stool DNA Isolation Kit (Sigma-Aldrich, St. Louis, MO, USA); <sup>h</sup>Innu PREP Stool DNA kit (Analytik Jena, Berlin, Germany); <sup>i</sup>MagMAX™ Total Nucleic Acid Isolation Kit (Applied Biosystems by Thermo Fisher Scientific, Vilnius, Lithuania); <sup>j</sup>Nuclisens Magnetic Extraction Reagents (Biomérieux, Marcy-l'Étoile, France); <sup>k</sup>MagVet *Mycobacterium paratuberculosis* Isolation Kit (LSI, Lissieu, France); <sup>l</sup>ID Gene Mag Paratuberculosis Extraction Kit (ID vet Genetics, Grabels, France).

**Table S6.** Data derived from isolation efficiency of MAP DNA from faecal samples, unit: percentage [%].

| <b>Kit*</b>           | <b>Isolation Efficiency</b> | <b>Median</b> | <b>Mean</b> | <b>Upper Quartile</b> | <b>Lower Quartile</b> | <b>Standard Deviation</b> |
|-----------------------|-----------------------------|---------------|-------------|-----------------------|-----------------------|---------------------------|
| ZymoResearch          | 51.2<br>43<br>35.6          | 43            | 43.27       | 47.1                  | 39.3                  | 6.37                      |
| QIAamp DNA Stool      | 21.8<br>9.7<br>7.5          | 9.7           | 13.00       | 15.75                 | 8.6                   | 6.29                      |
| QIAamp Fast DNA Stool | 6.3<br>5.2<br>10.5          | 6.3           | 7.33        | 8.4                   | 5.75                  | 2.28                      |
| Power Fecal           | 41<br>26.5<br>17.5          | 26.5          | 28.33       | 33.75                 | 22                    | 9.68                      |
| Power Soil            | 44.2<br>19.6<br>20.9        | 20.9          | 28.33       | 32.55                 | 20.25                 | 11.30                     |
| NucleoSpin            | 16.7<br>10.1<br>5.4         | 10.1          | 10.73       | 13.4                  | 7.75                  | 4.63                      |
| GeneElute             | 3.2<br>2.2<br>3             | 3             | 2.80        | 3.1                   | 2.6                   | 0.43                      |
| innuPREP              | 0<br>0.1<br>0.1             | 0.1           | 0.07        | 0.1                   | 0.05                  | 0.05                      |
| MagMAX                | 11.6<br>13.7<br>12.4        | 12.4          | 12.57       | 13.05                 | 12                    | 0.87                      |
| Nuclisens             | 0<br>0<br>0                 | 0             | 0           | 0                     | 0                     | 0                         |
| MagVet                | 2.4<br>2.3<br>0             | 2.3           | 1.57        | 2.35                  | 1.15                  | 1.11                      |
| ID Gene               | 0<br>0<br>0                 | 0             | 0           | 0                     | 0                     | 0                         |

\*For detailed DNA isolation kit information see Table S5.

Table S7. Efficiency of MAP DNA isolation from milk.

| Kit                    | Blood and Tissue <sup>a</sup> |                | MagVet <sup>b</sup>    |                | MagMAX <sup>c</sup>    |                | Nuclisens <sup>d</sup> |               | BioSprint <sup>e</sup> |               | EZ1 <sup>f</sup>       |               | ZymoResearch <sup>g</sup> |                |
|------------------------|-------------------------------|----------------|------------------------|----------------|------------------------|----------------|------------------------|---------------|------------------------|---------------|------------------------|---------------|---------------------------|----------------|
| Input <sup>h</sup>     | Output <sup>i</sup>           | Efficiency [%] | Output <sup>i</sup>    | Efficiency [%] | Output <sup>i</sup>    | Efficiency [%] | Output <sup>i</sup>    | Efficiency[%] | Output <sup>i</sup>    | Efficiency[%] | Output <sup>i</sup>    | Efficiency[%] | Output <sup>i</sup>       | Efficiency [%] |
| 2.48 × 10 <sup>7</sup> | 7.37 × 10 <sup>6</sup>        | 29.7           | 1.86 × 10 <sup>5</sup> | 0.8            | 7.99 × 10 <sup>5</sup> | 3.2            | 1.43 × 10 <sup>4</sup> | 0.1           | 2.75 × 10 <sup>5</sup> | 1.1           | 2.01 × 10 <sup>4</sup> | 0.1           | 4.89 × 10 <sup>6</sup>    | 19.7           |
| 2.48 × 10 <sup>6</sup> | 2.58 × 10 <sup>5</sup>        | 10.4           | 1.59 × 10 <sup>4</sup> | 0.6            | 5.66 × 10 <sup>4</sup> | 2.3            | 7.63 × 10 <sup>2</sup> | 0.0           | 2.07 × 10 <sup>4</sup> | 0.8           | 2.02 × 10 <sup>3</sup> | 0.1           | 2.41 × 10 <sup>5</sup>    | 9.7            |
| 2.48 × 10 <sup>5</sup> | 1.67 × 10 <sup>4</sup>        | 6.7            | 1.13 × 10 <sup>3</sup> | 0.5            | 2.77 × 10 <sup>3</sup> | 1.1            | 7.40 × 10 <sup>0</sup> | 0.0           | 1.51 × 10 <sup>3</sup> | 0.6           | 1.86 × 10 <sup>2</sup> | 0.1           | 2.69 × 10 <sup>4</sup>    | 10.8           |

<sup>a</sup>DNeasy® Blood and tissue kit (QIAGEN, Hilden, Germany); <sup>b</sup>MagVet *Mycobacterium paratuberculosis* Isolation Kit (LSI, Lissieu, France); <sup>c</sup>MagMAX™ Total Nucleic Acid Isolation Kit (Applied Biosystems by Thermo Fisher Scientific, Vilnius, Lithuania); <sup>d</sup>Nuclisens Magnetic Extraction Reagents (Biomérieux, Marcy-l'Étoile, France); <sup>e</sup>BioSprint 96 One-For-All-Vet (QIAGEN, Hilden, Germany); <sup>f</sup>EZ1 DNA Tissue Kit (QIAGEN, Hilden, Germany); <sup>g</sup>ZR Quick-DNA Fecal Soil Microbe Microprep Kit (Zymo Research, Tustin, CA, USA); <sup>h</sup>Input is calculated as the mean number of MAP cells in a 10 µl dose of MAP culture suspension used for artificial contamination; <sup>i</sup>Output is calculated (based on F57 qPCR) as the mean number of MAP cells per sample recovered after DNA isolation.

Table S8. Comparison of efficiency of MAP DNA isolation from faeces.

| Kit           | Zymo Research <sup>a</sup> |                        |                | QIAamp DNA Stool <sup>b</sup> |                | QIAamp Fast DNA <sup>c</sup> Stool |                | Power Fecal <sup>d</sup> |               | Power Soil <sup>e</sup> |               | NucleoSpin <sup>f</sup> |               |
|---------------|----------------------------|------------------------|----------------|-------------------------------|----------------|------------------------------------|----------------|--------------------------|---------------|-------------------------|---------------|-------------------------|---------------|
| Sample type   | Input <sup>m</sup>         | Output <sup>n</sup>    | Efficiency [%] | Output <sup>n</sup>           | Efficiency [%] | Output                             | Efficiency [%] | Output <sup>n</sup>      | Efficiency[%] | Output                  | Efficiency[%] | Output                  | Efficiency[%] |
| Faecal sample | 5.60 × 10 <sup>6</sup>     | 2.87 × 10 <sup>6</sup> | 51.2           | 1.22 × 10 <sup>6</sup>        | 21.8           | 3.50 × 10 <sup>5</sup>             | 6.3            | 2.30 × 10 <sup>6</sup>   | 41.0          | 2.47 × 10 <sup>6</sup>  | 44.2          | 9.33 × 10 <sup>5</sup>  | 16.7          |
|               | 5.60 × 10 <sup>5</sup>     | 2.41 × 10 <sup>5</sup> | 43.0           | 5.45 × 10 <sup>4</sup>        | 9.7            | 2.92 × 10 <sup>4</sup>             | 5.2            | 1.49 × 10 <sup>5</sup>   | 26.5          | 1.10 × 10 <sup>5</sup>  | 19.6          | 5.68 × 10 <sup>4</sup>  | 10.1          |
|               | 5.60 × 10 <sup>4</sup>     | 2.00 × 10 <sup>4</sup> | 35.6           | 4.19 × 10 <sup>3</sup>        | 7.5            | 5.87 × 10 <sup>3</sup>             | 10.5           | 9.80 × 10 <sup>3</sup>   | 17.5          | 1.17 × 10 <sup>4</sup>  | 20.9          | 3.03 × 10 <sup>3</sup>  | 5.4           |
| Faecal pellet | 5.60 × 10 <sup>6</sup>     | 3.63 × 10 <sup>6</sup> | 64.8           | 1.48 × 10 <sup>6</sup>        | 26.4           | 1.13 × 10 <sup>6</sup>             | 20.1           | 2.72 × 10 <sup>6</sup>   | 48.5          | 2.38 × 10 <sup>6</sup>  | 42.4          | 2.44 × 10 <sup>6</sup>  | 43.5          |
|               | 5.60 × 10 <sup>5</sup>     | 2.95 × 10 <sup>5</sup> | 52.7           | 6.36 × 10 <sup>4</sup>        | 11.3           | 1.82 × 10 <sup>4</sup>             | 3.2            | 1.26 × 10 <sup>5</sup>   | 22.6          | 1.29 × 10 <sup>5</sup>  | 23.0          | 1.73 × 10 <sup>5</sup>  | 30.8          |

|               | 5.60 × 10 <sup>4</sup> | 3.01 × 10 <sup>4</sup> | 53.7           | 9.95 × 10 <sup>3</sup> | 17.8           | 2.98 × 10 <sup>3</sup> | 5.3            | 1.05 × 10 <sup>4</sup> | 18.7           | 1.13 × 10 <sup>4</sup> | 20.2           | 1.41 × 10 <sup>4</sup> | 25.1           |
|---------------|------------------------|------------------------|----------------|------------------------|----------------|------------------------|----------------|------------------------|----------------|------------------------|----------------|------------------------|----------------|
|               | GeneElute <sup>g</sup> |                        |                | innuPREP <sup>h</sup>  |                | MagMAX <sup>i</sup>    |                | Nuclisens <sup>j</sup> |                | MagVet <sup>k</sup>    |                | ID Gene <sup>l</sup>   |                |
| Sample type   | Input <sup>m</sup>     | Output <sup>n</sup>    | Efficiency [%] | Output <sup>n</sup>    | Efficiency [%] | Output <sup>n</sup>    | Efficiency [%] | Output <sup>n</sup>    | Efficiency [%] | Output <sup>n</sup>    | Efficiency [%] | Output <sup>n</sup>    | Efficiency [%] |
| Faecal sample | 5.60 × 10 <sup>6</sup> | 1.81 × 10 <sup>5</sup> | 3.2            | 5.07 × 10 <sup>2</sup> | 0.0            | 6.47 × 10 <sup>5</sup> | 11.6           |                        | 0.0            | 1.34 × 10 <sup>5</sup> | 2.4            |                        | 0.0            |
|               | 5.60 × 10 <sup>5</sup> | 1.20 × 10 <sup>4</sup> | 2.2            | 4.32 × 10 <sup>2</sup> | 0.1            | 7.69 × 10 <sup>4</sup> | 13.7           | inhibition             | 0.0            | 1.31 × 10 <sup>4</sup> | 2.3            | inhibition             | 0.0            |
|               | 5.60 × 10 <sup>4</sup> | 1.70 × 10 <sup>3</sup> | 3.0            | 6.73 × 10 <sup>1</sup> | 0.1            | 6.95 × 10 <sup>3</sup> | 12.4           |                        | 0.0            | 0.00 × 10 <sup>0</sup> | 0.0            |                        | 0.0            |
| Faecal pellet | 5.60 × 10 <sup>6</sup> | 1.33 × 10 <sup>6</sup> | 23.7           | 5.69 × 10 <sup>2</sup> | 0.0            | 1.06 × 10 <sup>6</sup> | 19.0           | 1.10×10 <sup>5</sup>   | 2.0            | 1.71 × 10 <sup>5</sup> | 3.1            | 2.22 × 10 <sup>5</sup> | 4.0            |
|               | 5.60 × 10 <sup>5</sup> | 2.05 × 10 <sup>4</sup> | 3.7            | 4.00 × 10 <sup>2</sup> | 0.1            | 6.97 × 10 <sup>4</sup> | 12.4           | 4.15×10 <sup>3</sup>   | 0.7            | 6.94 × 10 <sup>3</sup> | 1.2            | 1.00 × 10 <sup>4</sup> | 1.8            |
|               | 5.60 × 10 <sup>4</sup> | 1.26 × 10 <sup>3</sup> | 2.2            | 5.24 × 10 <sup>2</sup> | 0.1            | 8.48 × 10 <sup>3</sup> | 15.1           | 3.64×10 <sup>2</sup>   | 0.7            | 1.36 × 10 <sup>3</sup> | 2.4            | 5.87 × 10 <sup>2</sup> | 1.1            |

<sup>a</sup>ZR Quick-DNA Fecal Soil Microbe Microprep Kit (Zymo Research, Tustin, CA, USA); <sup>b</sup>QIAamp DNA Stool Mini Kit (QIAGEN, Hilden, Germany); <sup>c</sup>QIAamp Fast DNA Stool Mini Kit (QIAGEN, Hilden, Germany); <sup>d</sup>Power Fecal DNA Kit (QIAGEN, Hilden, Germany); <sup>e</sup>DNeasy Power Soil Kit (QIAGEN, Hilden, Germany); <sup>f</sup>NucleoSpin DNA Stool (Macherey-Nagel, Düren, Germany); <sup>g</sup>Gene Elute Stool DNA Isolation Kit (Sigma-Aldrich, St. Louis, MO, USA); <sup>h</sup>Innu PREP Stool DNA kit (Analytik Jena, Berlin, Germany); <sup>i</sup>MagMAX™ Total Nucleic Acid Isolation Kit (Applied Biosystems by Thermo Fisher Scientific, Vilnius, Lithuania); <sup>j</sup>Nuclisens Magnetic Extraction Reagents (Biomérieux, Marcy-l'Étoile, France); <sup>k</sup>MagVet *Mycobacterium paratuberculosis* Isolation Kit (LSI, Lissieu, France); <sup>l</sup>ID Gene Mag Paratuberculosis Extraction Kit (ID vet Genetics, Grabels, France); <sup>m</sup>Input is calculated as the mean number of MAP cells in a 10 µl dose of MAP culture suspension used for artificial contamination; <sup>n</sup>Output is calculated (based on F57 qPCR) as the mean number of MAP cells per sample recovered after DNA isolation.

Table S9. Automatic magnetic separation of MAP DNA in milk.

| Mag Universal <sup>a</sup> Extraction Kit |                     |                | Mag Fast Extraction Kit <sup>b</sup> |                | MagVet <sup>c</sup> |                | MagMAX <sup>d</sup> |                | BioSprint <sup>e</sup> |               |
|-------------------------------------------|---------------------|----------------|--------------------------------------|----------------|---------------------|----------------|---------------------|----------------|------------------------|---------------|
| Input <sup>f</sup>                        | Output <sup>g</sup> | Efficiency [%] | Output <sup>g</sup>                  | Efficiency [%] | Output <sup>g</sup> | Efficiency [%] | Output <sup>g</sup> | Efficiency [%] | Output <sup>g</sup>    | Efficiency[%] |
| $1.40 \times 10^7$                        | $3.85 \times 10^5$  | 2.8            | $3.53 \times 10^6$                   | 25.3           | $7.70 \times 10^5$  | 5.5            | $2.13 \times 10^6$  | 15.3           | $3.86 \times 10^5$     | 2.8           |
| $1.40 \times 10^6$                        | $3.80 \times 10^4$  | 2.7            | $1.55 \times 10^5$                   | 11.1           | $3.37 \times 10^4$  | 2.4            | $1.07 \times 10^5$  | 7.7            | $2.12 \times 10^4$     | 1.5           |
| $1.40 \times 10^5$                        | $1.64 \times 10^3$  | 1.2            | $9.53 \times 10^3$                   | 6.8            | $1.66 \times 10^3$  | 1.2            | $6.15 \times 10^3$  | 4.4            | $5.05 \times 10^2$     | 0.4           |

<sup>a</sup>ID Gene™ Mag Universal Extraction Kit (ID vet Genetics, Grabels, France); <sup>b</sup>ID Gene™ Mag Fast Extraction Kit (ID vet Genetics, Grabels, France); <sup>c</sup>MagVet *Mycobacterium paratuberculosis* Isolation Kit (LSI, Lissieu, France); <sup>d</sup>MagMAX™ Total Nucleic Acid Isolation Kit (Applied Biosystems by Thermo Fisher Scientific, Vilnius, Lithuania); <sup>e</sup>BioSprint 96 One-For-All-Vet (QIAGEN, Hilden, Germany); <sup>f</sup>Input is calculated as the mean number of MAP cells in a 10 µl dose of MAP culture suspension used for artificial contamination; <sup>g</sup>Output is calculated (based on F57 qPCR) as the mean number of MAP cells per sample recovered after DNA isolation.



**Table 10.** Data derived from isolation efficiency of MAP DNA automatic magnetic separation from milk, unit: percentage [%].

| Kit                             | Isolation Efficiency | Median | Mean  | Upper Quartile | Lower Quartile | Standard Deviation |
|---------------------------------|----------------------|--------|-------|----------------|----------------|--------------------|
| MagUniversal <sup>a</sup>       | 2.8                  | 2.7    | 2.23  | 2.75           | 1.95           | 0.73               |
|                                 | 2.7                  |        |       |                |                |                    |
|                                 | 1.2                  |        |       |                |                |                    |
| MagFast Extraction <sup>b</sup> | 25.3                 | 11.1   | 14.40 | 18.2           | 8.95           | 7.90               |
|                                 | 11.1                 |        |       |                |                |                    |
|                                 | 6.8                  |        |       |                |                |                    |
| MagVet <sup>c</sup>             | 5.5                  | 2.4    | 3.03  | 3.95           | 1.8            | 1.81               |
|                                 | 2.4                  |        |       |                |                |                    |
|                                 | 1.2                  |        |       |                |                |                    |
| MagMAX <sup>d</sup>             | 15.3                 | 7.7    | 9.13  | 11.5           | 6.05           | 4.56               |
|                                 | 7.7                  |        |       |                |                |                    |
|                                 | 4.4                  |        |       |                |                |                    |
| BioSprint <sup>e</sup>          | 2.8                  | 1.5    | 1.57  | 2.15           | 0.95           | 0.98               |
|                                 | 1.5                  |        |       |                |                |                    |
|                                 | 0.4                  |        |       |                |                |                    |

<sup>a</sup>ID Gene™ Mag Universal Extraction Kit (ID vet Genetics, Grabels, France); <sup>b</sup>ID Gene™ Mag Fast Extraction Kit (ID vet Genetics, Grabels, France); <sup>c</sup>MagVet *Mycobacterium paratuberculosis* Isolation Kit (LSI, Lissieu, France); <sup>d</sup>MagMAX™ Total Nucleic Acid Isolation Kit (Applied Biosystems by Thermo Fisher Scientific, Vilnius, Lithuania); <sup>e</sup>BioSprint 96 One-For-All-Vet (QIAGEN, Hilden, Germany).

**Table S11.** Comparison of manual and automatic magnetic separation of MAP DNA in milk.

| Isolation type | MagVet <sup>a</sup> |                     |                | MagMAX <sup>b</sup> |                | BioSprint <sup>c</sup> |                |
|----------------|---------------------|---------------------|----------------|---------------------|----------------|------------------------|----------------|
|                | Input <sup>d</sup>  | Output <sup>e</sup> | Efficiency [%] | Output <sup>e</sup> | Efficiency [%] | Output <sup>e</sup>    | Efficiency [%] |
| Manual         | $2.48 \times 10^7$  | $1.86 \times 10^5$  | 0.8            | $7.99 \times 10^5$  | 3.2            | $2.75 \times 10^5$     | 1.1            |
|                | $2.48 \times 10^6$  | $1.59 \times 10^4$  | 0.6            | $5.66 \times 10^4$  | 2.3            | $2.07 \times 10^4$     | 0.8            |
|                | $2.48 \times 10^5$  | $1.13 \times 10^3$  | 0.5            | $2.77 \times 10^3$  | 1.1            | $1.51 \times 10^3$     | 0.6            |
| Automatic      | $1.40 \times 10^7$  | $7.70 \times 10^5$  | 5.5            | $2.13 \times 10^6$  | 15.3           | $3.86 \times 10^5$     | 2.8            |
|                | $1.40 \times 10^6$  | $3.37 \times 10^4$  | 2.4            | $1.07 \times 10^5$  | 7.7            | $2.12 \times 10^4$     | 1.5            |
|                | $1.40 \times 10^5$  | $1.66 \times 10^3$  | 1.2            | $6.15 \times 10^3$  | 4.4            | $5.05 \times 10^2$     | 0.4            |

<sup>a</sup>MagVet *Mycobacterium paratuberculosis* Isolation Kit (LSI, Lissieu, France); <sup>b</sup>MagMAX<sup>TM</sup> Total Nucleic Acid Isolation Kit (Applied Biosystems by Thermo Fisher Scientific, Vilnius, Lithuania); <sup>c</sup>BioSprint 96 One-For-All-Vet (QIAGEN, Hilden, Germany); <sup>d</sup>Input is calculated as the mean number of MAP cells in a 10 µl dose of MAP culture suspension used for artificial contamination; <sup>e</sup>Output is calculated (based on F57 qPCR) as the mean number of MAP cells per sample recovered after DNA isolation.

**Table S12.** Comparison of isolation efficiency derived data of MAP DNA manual and automatic magnetic separation from milk, unit: percentage [%].

| Isolation Type         | Kit                 | Isolation Efficiency | Median | Mean | Upper Quartile | Lower Quartile | Standard Deviation |
|------------------------|---------------------|----------------------|--------|------|----------------|----------------|--------------------|
| Manual                 | MagVet <sup>a</sup> | 0.8                  | 0.6    | 0.63 | 0.7            | 0.55           | 0.12               |
|                        |                     | 0.6                  |        |      |                |                |                    |
|                        |                     | 0.5                  |        |      |                |                |                    |
|                        | MagMAX <sup>b</sup> | 3.2                  | 2.3    | 2.20 | 2.75           | 1.7            | 0.86               |
|                        |                     | 2.3                  |        |      |                |                |                    |
|                        |                     | 1.1                  |        |      |                |                |                    |
| BioSprint <sup>c</sup> | 1.1                 | 0.8                  | 0.83   | 0.95 | 0.7            | 0.21           |                    |
|                        | 0.8                 |                      |        |      |                |                |                    |
|                        | 0.6                 |                      |        |      |                |                |                    |
| Automatic              | MagVet <sup>a</sup> | 5.5                  | 2.4    | 3.03 | 3.95           | 1.8            | 1.81               |
|                        |                     | 2.4                  |        |      |                |                |                    |
|                        |                     | 1.2                  |        |      |                |                |                    |
|                        | MagMAX <sup>b</sup> | 15.3                 | 7.7    | 9.13 | 11.5           | 6.05           | 4.56               |
|                        |                     | 7.7                  |        |      |                |                |                    |
|                        |                     | 4.4                  |        |      |                |                |                    |
| BioSprint <sup>c</sup> | 2.8                 | 1.5                  | 1.57   | 2.15 | 0.95           | 0.98           |                    |
|                        | 1.5                 |                      |        |      |                |                |                    |
|                        | 0.4                 |                      |        |      |                |                |                    |

<sup>a</sup>MagVet *Mycobacterium paratuberculosis* Isolation Kit (LSI, Lissieu, France); <sup>b</sup>MagMAX<sup>TM</sup> Total Nucleic Acid Isolation Kit (Applied Biosystems by Thermo Fisher Scientific, Vilnius, Lithuania); <sup>c</sup>BioSprint 96 One-For-All-Vet (QIAGEN, Hilden, Germany).

**Table S13.** Concentration and purity of nucleic acids isolated from milk.

| Kit <sup>a</sup>    | Theoretical Input<br>[MAP cells/ml] | NA <sup>b</sup>          |         |         |
|---------------------|-------------------------------------|--------------------------|---------|---------|
|                     |                                     | Concentration<br>[ng/μl] | 260/280 | 260/230 |
| Blood and<br>tissue | 2.48 × 07                           | 216.4                    | 1.57    | 0.31    |
|                     | 2.48 × 07                           | 286.1                    | 1.59    | 0.36    |
|                     | 2.48 × 07                           | 281.3                    | 1.56    | 0.35    |
|                     | 2.48 × 06                           | 179.0                    | 1.60    | 0.31    |
|                     | 2.48 × 06                           | 214.2                    | 1.54    | 0.30    |
|                     | 2.48 × 06                           | 171.3                    | 1.58    | 0.33    |
|                     | 2.48 × 05                           | 151.6                    | 1.44    | 0.23    |
|                     | 2.48 × 05                           | 209.6                    | 1.52    | 0.30    |
|                     | 2.48 × 05                           | 184.4                    | 1.51    | 0.27    |
| MagVet              |                                     | 11.0                     | 1.21    | 0.23    |
|                     |                                     | 6.4                      | 1.66    | 0.41    |
|                     |                                     | 7.5                      | 1.38    | 0.29    |
|                     |                                     | 1.2                      | 0.69    | 0.20    |
|                     |                                     | 7.4                      | 1.74    | 0.56    |
|                     |                                     | 9.3                      | 1.81    | 0.83    |
|                     |                                     | 12.3                     | 1.77    | 0.78    |
|                     |                                     | 7.9                      | 1.91    | 0.60    |
|                     |                                     | 6.9                      | 1.41    | 0.34    |
| MagMAX              |                                     | 64.1                     | 2.14    | 0.10    |
|                     |                                     | 93.5                     | 1.75    | 0.12    |
|                     |                                     | 63.3                     | 1.72    | 0.08    |
|                     |                                     | 63.3                     | 1.75    | 0.10    |
|                     |                                     | 93.1                     | 1.97    | 0.12    |
|                     |                                     | 61.9                     | 1.95    | 0.08    |
|                     |                                     | 116.2                    | 2.01    | 0.19    |
|                     |                                     | 58.7                     | 2.04    | 0.07    |
|                     |                                     | 86.4                     | 1.54    | 0.13    |
| Nuclisens           |                                     | 58.6                     | 1.45    | 0.17    |
|                     |                                     | 29.6                     | 1.36    | 0.09    |
|                     |                                     | 50.1                     | 1.46    | 0.17    |
|                     |                                     | 67.1                     | 1.47    | 0.22    |
|                     |                                     | 80.6                     | 1.48    | 0.38    |
|                     |                                     | 62.3                     | 1.45    | 0.26    |

| Kit <sup>a</sup> | Theoretical input<br>[MAP cells/ml] | NA <sup>b</sup>          | 260/280 | 260/230 |
|------------------|-------------------------------------|--------------------------|---------|---------|
|                  |                                     | concentration<br>[ng/μl] |         |         |
|                  |                                     | 43.8                     | 1.44    | 0.14    |
|                  |                                     | 40.9                     | 1.49    | 0.24    |
|                  |                                     | 78.8                     | 1.40    | 0.12    |
|                  |                                     | 74.8                     | 1.36    | 0.28    |
|                  |                                     | 105.2                    | 0.90    | 0.17    |
|                  |                                     | 56.0                     | 0.87    | 0.21    |
|                  |                                     | 41.3                     | 0.76    | 0.09    |
| BioSprint        |                                     | 55.1                     | 0.76    | 0.08    |
|                  |                                     | 93.6                     | 0.86    | 0.14    |
|                  |                                     | 49.4                     | 0.79    | 0.11    |
|                  |                                     | 36.1                     | 0.78    | 0.12    |
|                  |                                     | 44.8                     | 0.76    | 0.11    |
|                  |                                     | 10.5                     | 1.81    | 0.13    |
|                  |                                     | 10.5                     | 1.54    | 0.66    |
|                  |                                     | 10.1                     | 1.67    | 0.03    |
|                  |                                     | 11.7                     | 1.61    | 0.26    |
| EZ1              |                                     | 8.60                     | 1.40    | 0.01    |
|                  |                                     | 11.7                     | 1.50    | 0.08    |
|                  |                                     | 10.4                     | 1.51    | 0.07    |
|                  |                                     | 8.6                      | 1.54    | 0.07    |
|                  |                                     | 7.0                      | 1.42    | 0.59    |
|                  |                                     | 199.8                    | 1.81    | 2.03    |
|                  |                                     | 181.6                    | 1.82    | 2.09    |
|                  |                                     | 154.7                    | 1.82    | 2.00    |
| Zymo             |                                     | 222.4                    | 1.82    | 2.20    |
| Research         |                                     | 182.1                    | 1.82    | 2.19    |
|                  |                                     | 202.9                    | 1.82    | 2.15    |
|                  |                                     | 196.7                    | 1.82    | 2.19    |
|                  |                                     | 193.2                    | 1.81    | 2.13    |
|                  |                                     | 155.9                    | 1.81    | 2.06    |

<sup>a</sup>For complete kit information see Supplementary information Table 1; <sup>b</sup>NA = Nucleid Acid

**Table S14.** Concentration and purity of nucleic acid isolated from faecal pellets.

| Kit <sup>a</sup> | Theoretical Input<br>[MAP cells/ml] | NA <sup>b</sup><br>Concentration<br>[ng/μl] | 260/280 | 260/230 |
|------------------|-------------------------------------|---------------------------------------------|---------|---------|
| Zymo             | 5.60 × 06                           | 61.9                                        | 1.79    | 1.72    |
| Research         | 5.60 × 06                           | 46.9                                        | 1.86    | 1.78    |
|                  | 5.60 × 05                           | 25.4                                        | 1.89    | 1.35    |
|                  | 5.60 × 05                           | 66.6                                        | 1.79    | 1.90    |
|                  | 5.60 × 04                           | 68.3                                        | 1.88    | 1.84    |
|                  | 5.60 × 04                           | 49.2                                        | 1.83    | 1.19    |
|                  |                                     |                                             |         |         |
| QIAamp DNA       |                                     | 2.0                                         | 1.19    | 0.54    |
| Stool            |                                     | 2.6                                         | 1.38    | 0.57    |
|                  |                                     | 2.6                                         | 1.63    | 0.51    |
|                  |                                     | 1.9                                         | 1.06    | 0.53    |
|                  |                                     | 23.8                                        | 1.90    | 0.39    |
|                  |                                     | 3.2                                         | 1.36    | 0.54    |
|                  |                                     |                                             |         |         |
| QIAamp Fast      |                                     | 4.2                                         | 2.08    | 1.47    |
| DNA Stool        |                                     | 4.6                                         | 2.53    | 2.28    |
|                  |                                     | 4.7                                         | 2.43    | 2.79    |
|                  |                                     | 4.3                                         | 2.39    | 3.65    |
|                  |                                     | 4.7                                         | 2.41    | 1.97    |
|                  |                                     | 4.7                                         | 2.57    | 2.38    |
|                  |                                     |                                             |         |         |
| Power Fecal      |                                     | 11.7                                        | 1.78    | 1.58    |
|                  |                                     | 11.5                                        | 1.73    | 1.41    |
|                  |                                     | 12.8                                        | 1.65    | 1.43    |
|                  |                                     | 15.1                                        | 1.84    | 0.71    |
|                  |                                     | 12.5                                        | 1.82    | 1.45    |
|                  |                                     | 11.6                                        | 1.72    | 1.63    |
|                  |                                     |                                             |         |         |
| Power Soil       |                                     | 10.5                                        | 1.79    | 1.1     |
|                  |                                     | 12.9                                        | 1.80    | 1.09    |
|                  |                                     | 12.1                                        | 1.77    | 1.20    |
|                  |                                     | 13.4                                        | 1.72    | 1.06    |
|                  |                                     | 12.3                                        | 1.81    | 1.03    |
|                  |                                     | 12.3                                        | 1.81    | 1.11    |
|                  |                                     |                                             |         |         |
| NucleoSpin       |                                     | 42.0                                        | 1.55    | 1.01    |
|                  |                                     | 42.4                                        | 1.53    | 0.77    |
|                  |                                     | 43.0                                        | 1.53    | 0.92    |
|                  |                                     | 42.4                                        | 1.54    | 0.94    |

41.1      1.54      0.95  
43.0      1.53      0.91

| Kit <sup>a</sup> | Theoretical input<br>[MAP cells/ml] | NA <sup>b</sup><br>concentration<br>[ng/μl] | 260/280 | 260/230 |
|------------------|-------------------------------------|---------------------------------------------|---------|---------|
| GenElute         | 5.60 × 06                           | 65.7                                        | 1.44    | 0.51    |
|                  | 5.60 × 06                           | 66.3                                        | 1.50    | 0.59    |
|                  | 5.60 × 05                           | 59.4                                        | 1.51    | 0.23    |
|                  | 5.60 × 05                           | 63.1                                        | 1.52    | 0.52    |
|                  | 5.60 × 04                           | 62.0                                        | 1.52    | 0.55    |
|                  | 5.60 × 04                           | 61.5                                        | 1.50    | 0.37    |
| innuPREP         |                                     | 39.3                                        | 1.57    | 0.64    |
|                  |                                     | 61.2                                        | 1.5     | 0.48    |
|                  |                                     | 31.9                                        | 1.61    | 0.51    |
|                  |                                     | 33.4                                        | 1.62    | 0.64    |
|                  |                                     | 30.4                                        | 1.63    | 0.60    |
|                  |                                     | 23.2                                        | 1.62    | 0.65    |
| MagMAX           |                                     | 11.4                                        | 2.23    | 0.03    |
|                  |                                     | 10.8                                        | 2.21    | 0.09    |
|                  |                                     | 10.9                                        | 2.34    | 0.14    |
|                  |                                     | 9.8                                         | 2.51    | 0.26    |
|                  |                                     | 11.0                                        | 2.22    | 0.17    |
|                  |                                     | 13.9                                        | 2.16    | 0.28    |
| Nuclisens        |                                     | 83.0                                        | 1.34    | 0.12    |
|                  |                                     | 100.2                                       | 1.27    | 0.32    |
|                  |                                     | 121.0                                       | 1.29    | 0.16    |
|                  |                                     | 97.9                                        | 1.33    | 0.14    |
|                  |                                     | 110.0                                       | 1.29    | 0.17    |
|                  |                                     | 112.1                                       | 1.28    | 0.19    |
| MagVet           |                                     | 29.9                                        | 1.31    | 0.50    |
|                  |                                     | 34.2                                        | 1.31    | 0.52    |
|                  |                                     | 34.4                                        | 1.34    | 0.53    |
|                  |                                     | 29.4                                        | 1.31    | 0.52    |
|                  |                                     | 34.2                                        | 1.35    | 0.54    |
|                  |                                     | 36.6                                        | 1.33    | 0.52    |
| ID Gene          |                                     | 36.3                                        | 1.37    | 0.55    |

|      |      |      |
|------|------|------|
| 37.6 | 1.38 | 0.54 |
| 41.3 | 1.39 | 0.55 |
| 33.7 | 1.34 | 0.53 |
| 50.0 | 1.39 | 0.55 |
| 32.8 | 1.34 | 0.52 |

---

<sup>a</sup>For complete kit information see Supplementary information Table 2; <sup>b</sup>NA = Nucleid Acid.

---



**Table S15.** Concentration and purity of nucleic acid automatically isolated from milk.

| Kit <sup>a</sup>                | Theoretical Input<br>[MAP cells/ml] | NA <sup>b</sup><br>Concentration<br>[ng/μl] | 260/280 | 260/230 |
|---------------------------------|-------------------------------------|---------------------------------------------|---------|---------|
| Mag Universal<br>Extraction Kit | 1.40 × 07                           | 11.9                                        | 1.61    | 0.83    |
|                                 | 1.40 × 07                           | 11.4                                        | 1.63    | 1.24    |
|                                 | 1.40 × 07                           | 13.2                                        | 1.65    | 1.27    |
|                                 | 1.40 × 06                           | 13.8                                        | 1.80    | 1.38    |
|                                 | 1.40 × 06                           | 16.8                                        | 1.74    | 1.90    |
|                                 | 1.40 × 06                           | 23.0                                        | 1.81    | 1.68    |
|                                 | 1.40 × 05                           | 21.9                                        | 1.77    | 1.83    |
|                                 | 1.40 × 05                           | 11.6                                        | 1.76    | 1.65    |
|                                 | 1.40 × 05                           | 18.2                                        | 1.70    | 1.20    |
| Mag Fast<br>Extraction kit      |                                     | 27.1                                        | 1.50    | 0.76    |
|                                 |                                     | 25.6                                        | 1.50    | 0.85    |
|                                 |                                     | 29.5                                        | 1.57    | 0.99    |
|                                 |                                     | 30.4                                        | 1.54    | 0.92    |
|                                 |                                     | 27.0                                        | 1.52    | 0.85    |
|                                 |                                     | 25.6                                        | 1.50    | 0.77    |
|                                 |                                     | 27.5                                        | 1.57    | 0.83    |
|                                 |                                     | 30.0                                        | 1.65    | 0.93    |
|                                 |                                     | 25.0                                        | 1.50    | 0.88    |
| MagVet                          |                                     | 9.7                                         | 1.54    | 0.90    |
|                                 |                                     | 8.5                                         | 1.55    | 0.91    |
|                                 |                                     | 10.9                                        | 1.55    | 1.00    |
|                                 |                                     | 10.7                                        | 1.60    | 0.93    |
|                                 |                                     | 7.7                                         | 1.76    | 0.92    |
|                                 |                                     | 11.4                                        | 1.53    | 0.85    |
|                                 |                                     | 9.2                                         | 1.56    | 0.78    |
|                                 |                                     | 10.6                                        | 1.50    | 0.77    |
| MagMAX                          |                                     | 8.6                                         | 1.60    | 0.71    |
|                                 |                                     | 34.3                                        | 2.16    | 1.33    |
|                                 |                                     | 29.4                                        | 2.16    | 1.51    |
|                                 |                                     | 42.5                                        | 2.07    | 1.10    |
|                                 |                                     | 41.9                                        | 2.06    | 1.28    |
|                                 |                                     | 35.1                                        | 2.04    | 1.14    |
|                                 |                                     | 35.6                                        | 2.12    | 1.19    |
|                                 |                                     | 30.3                                        | 2.08    | 1.37    |
|                                 | 29.0                                | 2.28                                        | 1.79    |         |
|                                 | 29.1                                | 2.12                                        | 1.44    |         |

|           |      |      |      |
|-----------|------|------|------|
| BioSprint | 35.9 | 1.76 | 0.74 |
|           | 32.9 | 1.68 | 0.74 |
|           | 43.3 | 1.70 | 0.56 |
|           | 34.1 | 1.76 | 0.56 |
|           | 42.9 | 1.76 | 0.69 |
|           | 37.2 | 1.86 | 0.78 |
|           | 23.5 | 2.12 | 1.35 |
|           | 32.2 | 1.85 | 0.96 |
|           | 12.8 | 2.21 | 1.62 |

<sup>a</sup>For complete kit information see Supplementary information Table 3; <sup>b</sup>NA = Nucleid Acid.

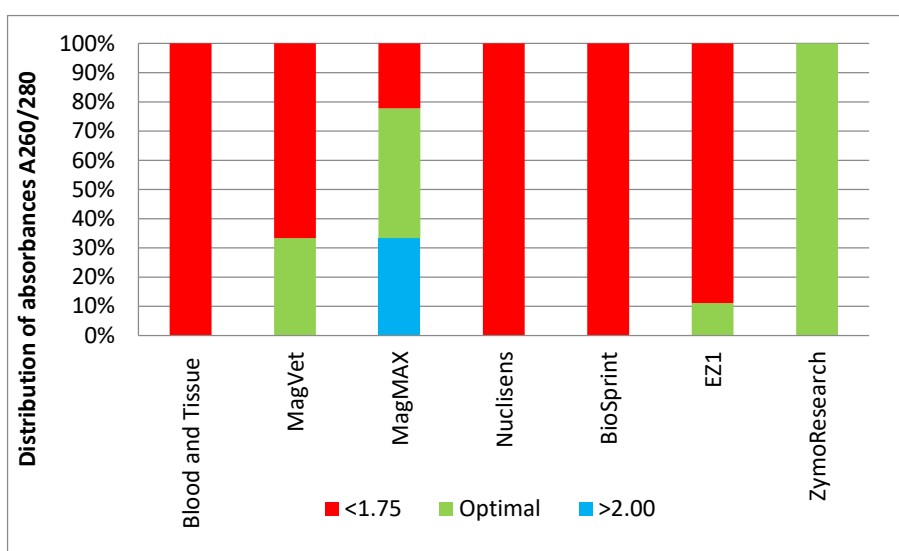

**Figure S1.** Distribution of DNA purity values of selected isolation kits for MAP DNA isolation from milk.

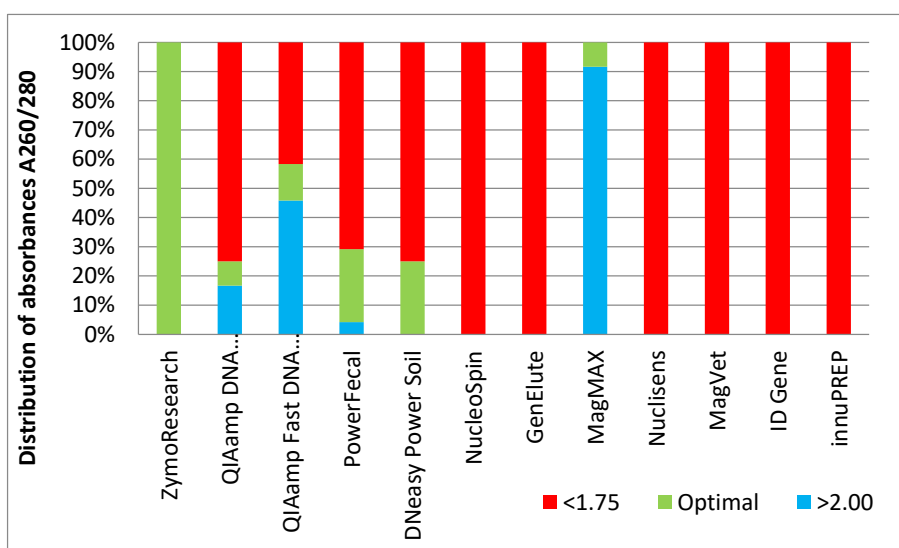

**Figure S2.** Distribution of DNA purity values of selected isolation kits for MAP DNA isolation from faeces.

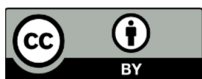

© 2020 by the authors. Licensee MDPI, Basel, Switzerland. This article is an open access article distributed under the terms and conditions of the Creative Commons Attribution (CC BY) license (<http://creativecommons.org/licenses/by/4.0/>).
